# Supplementary material for: Rational design of Janus MXene monolayers as promising frameworks for high-performance sodium metal anodes
Source: Royal Society of Chemistry journal article supplement (doi:10.1039/d4ta08733j), 2025-01-01
Supplement: d4ta08733j1.pdf [file d4ta08733j1.pdf]

## Supporting Information

### **Rational Design of Janus MXene Monolayers as Promising Frameworks for High-performance Sodium Metal Anodes**

Shengbo Wang<sup>a#</sup>, Ziang Ren<sup>a#</sup>, Jinsen Zhang<sup>a</sup>, Shihui Zou<sup>a</sup>, Huadong Yuan<sup>a</sup>, Jianmin Luo<sup>a</sup>, Yujing Liu<sup>a</sup>, Jianwei Nai<sup>a</sup>, Yao Wang<sup>\*ab</sup>, Xinyong Tao<sup>a</sup>

<sup>a</sup> College of Materials Science and Engineering, Zhejiang University of Technology, Hangzhou, 310014, China

<sup>b</sup> Moganshan Research Institute at Deqing County Zhejiang University of Technology, Huzhou, 313000, China

# These authors contributed equally to this work.

\*Corresponding author: [wangyao@zjut.edu.cn](mailto:wangyao@zjut.edu.cn) .

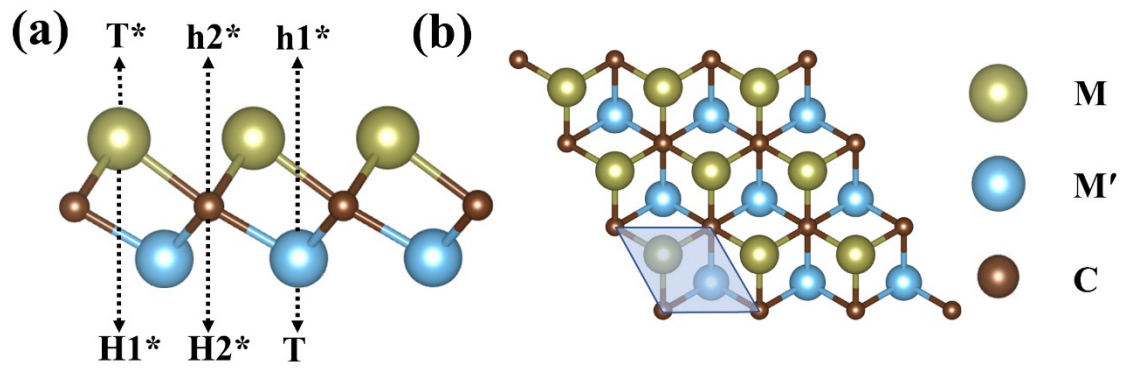

**Fig. S1.** (a) Side view and (b) top view of the MM'C Janus MXene structures. The dark yellow, light blue, and brown spheres represent M, M', and C atoms, respectively.

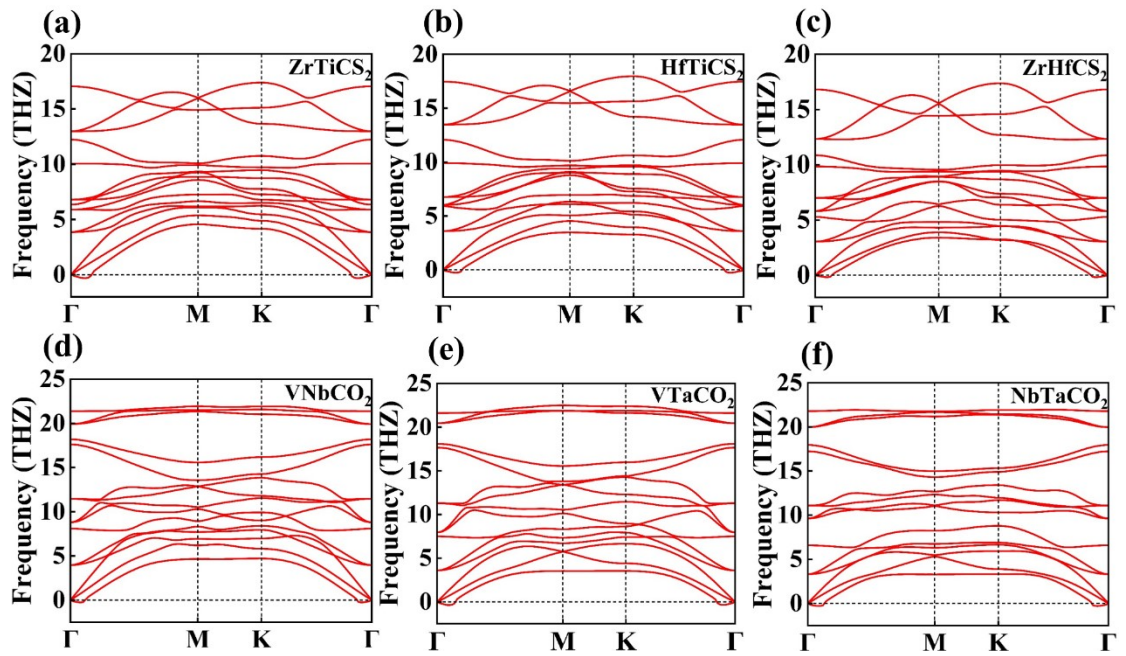

**Fig. S2.** Phonon spectra of (a) ZrTiCS<sub>2</sub>, (b) HfTiCS<sub>2</sub>, (c) ZrHfCS<sub>2</sub>, (d) VNbCO<sub>2</sub>, (e) VTaCO<sub>2</sub>, and (f) NbTaCO<sub>2</sub>.

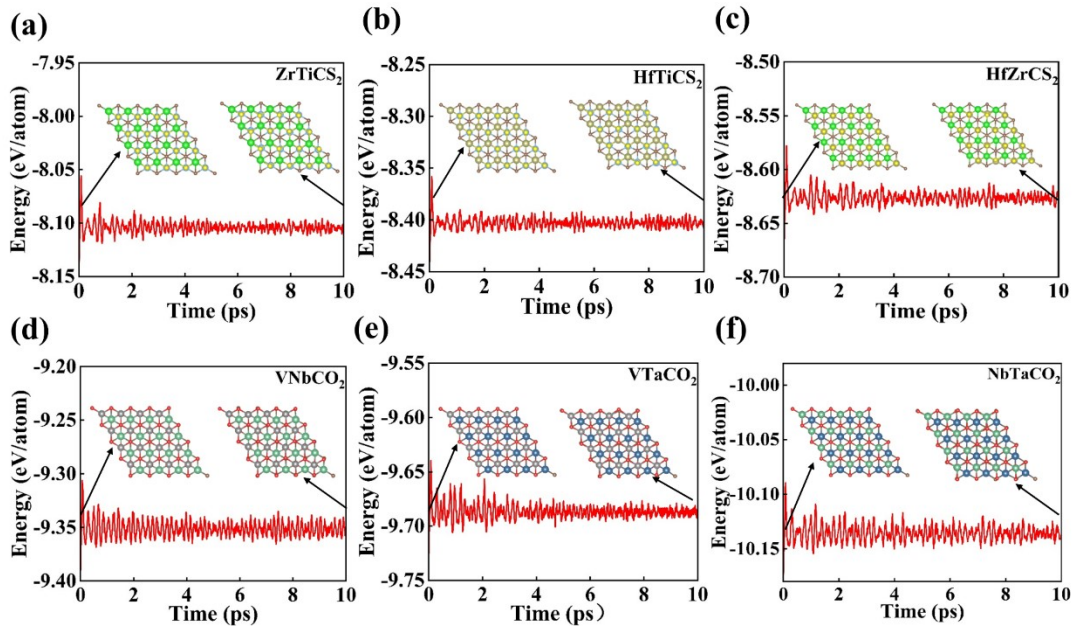

**Fig. S3.** Variation in energy over 10 ps during the AIMD simulation at 300 K of (a)  $\text{ZrTiCS}_2$ , (b)  $\text{HfTiCS}_2$ , (c)  $\text{ZrHfCS}_2$ , (d)  $\text{VNbCO}_2$ , (e)  $\text{VTaCO}_2$ , and (f)  $\text{NbTaCO}_2$  structure.

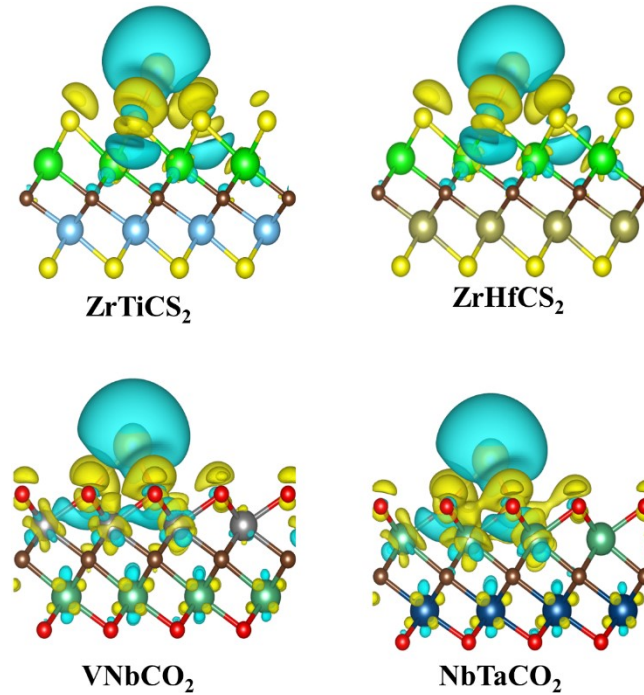

**Fig. S4.** Charge density difference ( $e^- \text{Å}^{-3}$ ) of the Na atom on  $\text{ZrTiCS}_2$ ,  $\text{ZrHfCS}_2$ ,  $\text{VNbCO}_2$ , and  $\text{NbTaCO}_2$ . The isosurface level is set to be  $0.0006 e^- \text{Å}^{-3}$ . The cyan and yellow regions indicate electron depletion and accumulation, respectively.

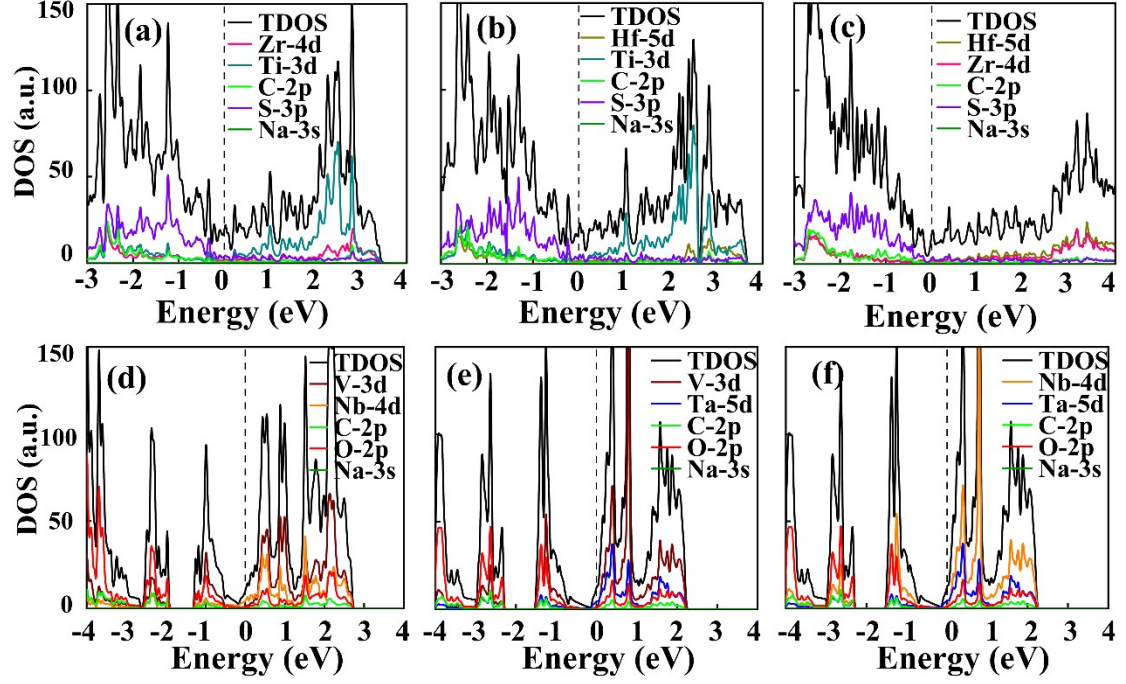

Fig. S5. Single-Na adsorption DOS of (a) ZrTiCS<sub>2</sub>, (b) HfTiCS<sub>2</sub>, (c) HfZrCS<sub>2</sub>, (d) VNbCO<sub>2</sub>, (e) VTaCO<sub>2</sub>, and (f) NbTaCO<sub>2</sub>. The Fermi level is set to zero.

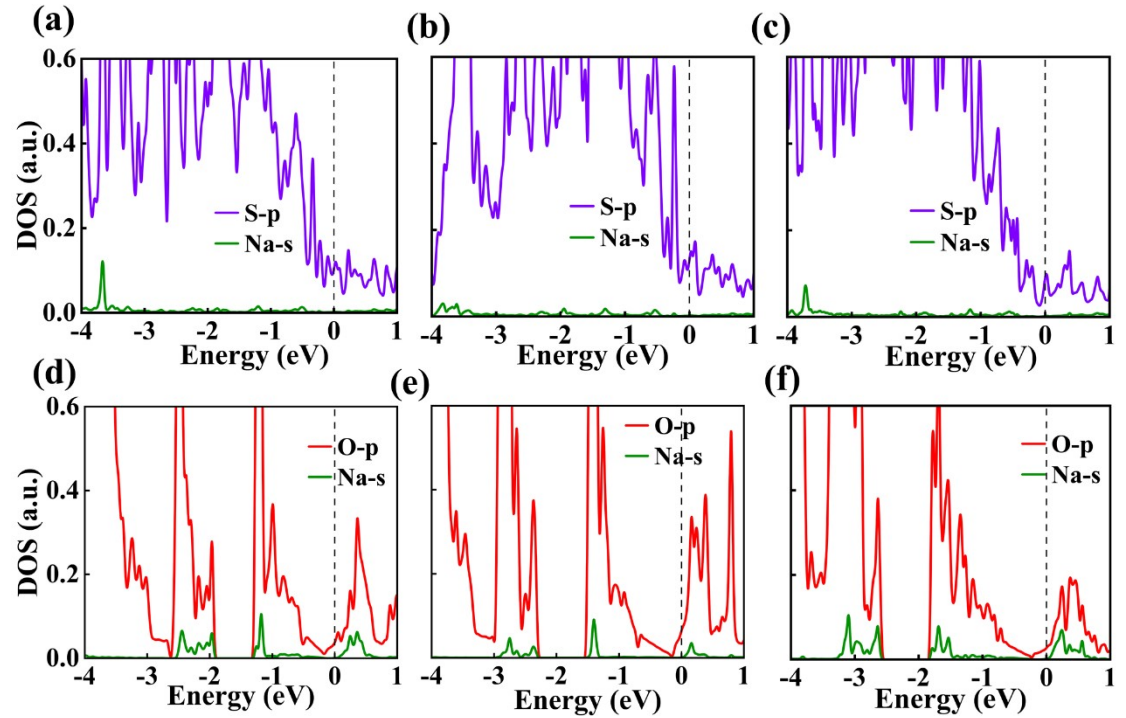

Fig. S6. (a-c) PDOS of the adsorbed Na atom and its surrounding S atom in ZrTiCS<sub>2</sub>, HfTiCS<sub>2</sub>, and HfZrCS<sub>2</sub>, (d-f) PDOS of the adsorbed Na atom and its surrounding O atom in VNbCO<sub>2</sub>, VTaCO<sub>2</sub>, and NbTaCO<sub>2</sub>. The Fermi level is set to zero.

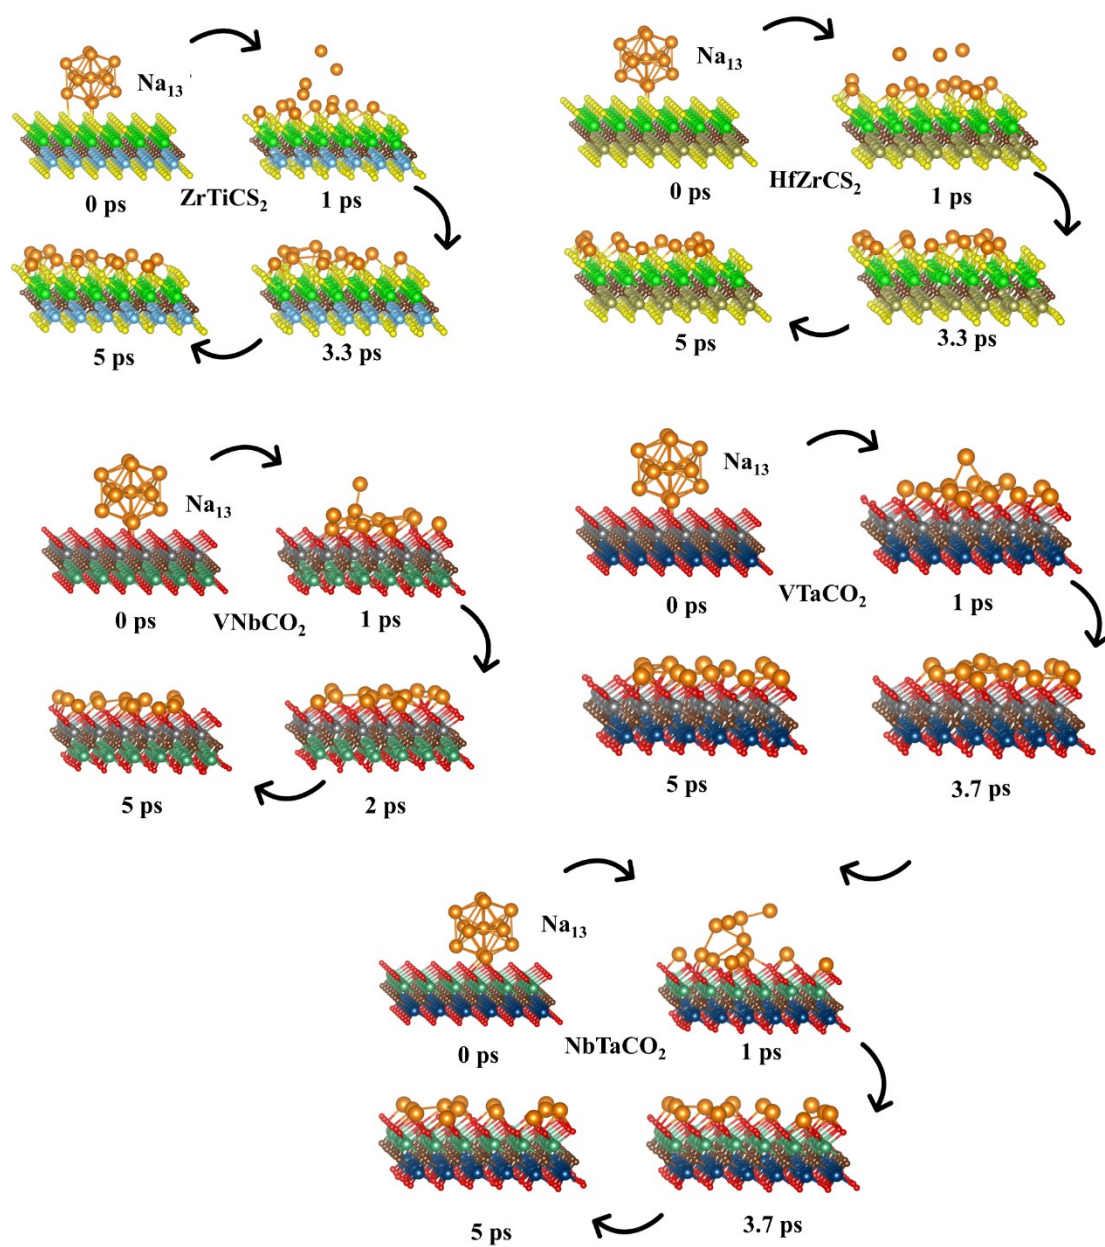

**Fig. S7.** Snapshots of AIMD simulations of  $\text{Na}_{13}$  on  $\text{ZrTiCS}_2$ ,  $\text{HfZrCS}_2$ ,  $\text{VNbCO}_2$ ,  $\text{VTaCO}_2$ , and  $\text{NbTaCO}_2$  Janus MXene at 300 K.

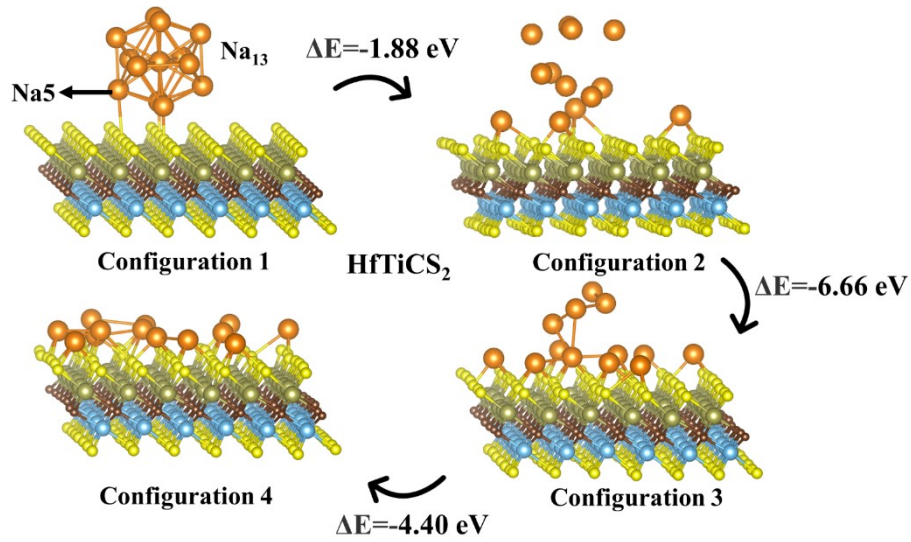

**Fig. S8.** The four-state structure of the  $\text{Na}_{13}$  cluster on the  $\text{HfTiCS}_2$  Janus MXene surface during the 3D-to-2D transition at 300 K.

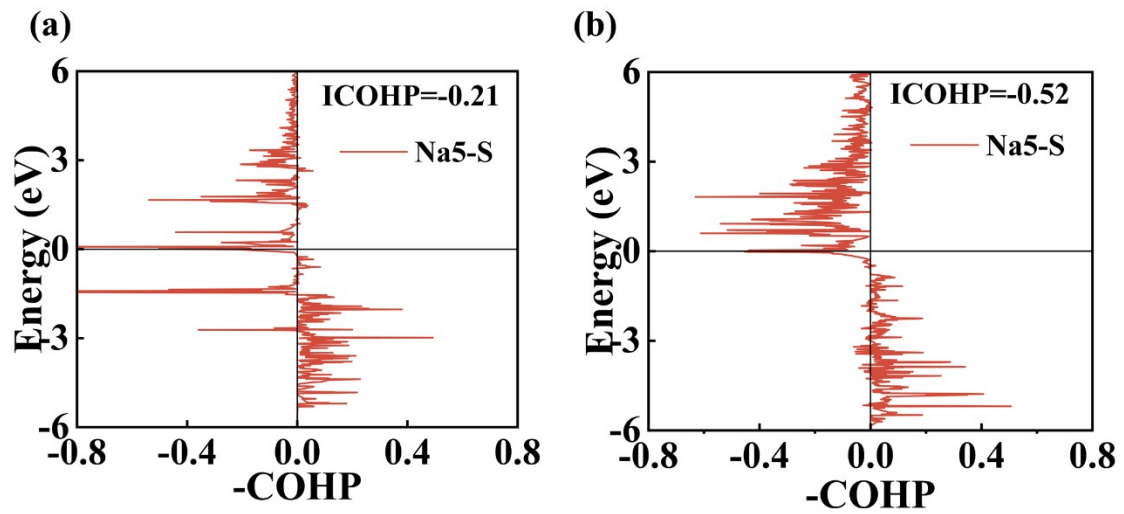

**Fig. S9.** (a) The COHP of Na5 atom within the  $\text{Na}_{13}$  clusters in interacting with surface S atoms in configuration 1. (b) The COHP of Na5 atom within the  $\text{Na}_{13}$  cluster in interacting with surface S atoms in configuration 4.

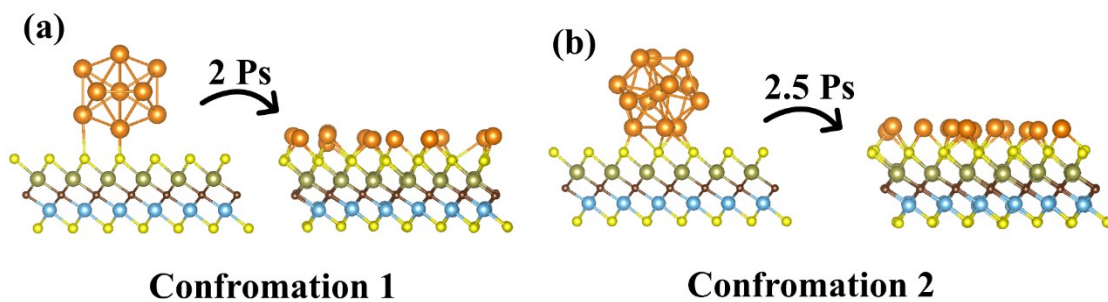

**Fig. S10.** Snapshots of AIMD simulations of different  $\text{Na}_{13}$  conformations on  $\text{HfTiCS}_2$  Janus MXene at 300 K. (a) Conformation 1. (b) Conformation 2.

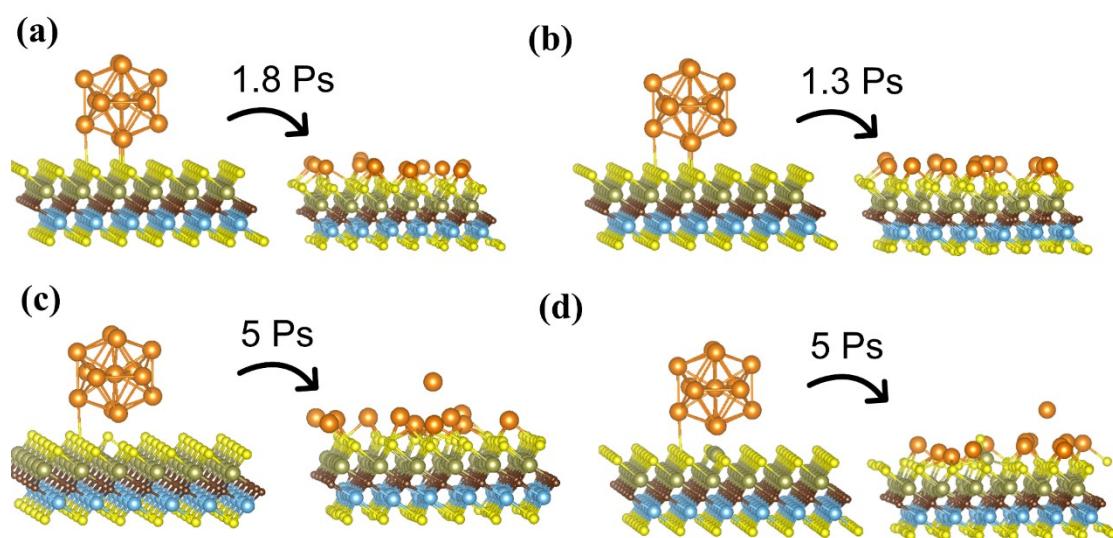

**Fig. S11.** (a) and (b) Snapshots of AIMD simulations of  $\text{Na}_{13}$  on  $\text{HfTiCS}_2$  Janus MXene at 400 K and 500K. (c) and (d) Snapshots of AIMD simulations of  $\text{Na}_{13}$  on vacancy-defect and doped-defect  $\text{HfTiCS}_2$  Janus MXene at 300 K

**Table S1.** Lattice parameter, lengths of M–C ( $d_{M-C}$ ), M'–C ( $d_{M'-C}$ ), M–S ( $d_{M-S}$ ), and M'–S ( $d_{M'-S}$ ) bonds of all MM'CS<sub>2</sub>, M<sub>2</sub>CS<sub>2</sub>, and M<sub>2</sub>'CS<sub>2</sub> MXenes are shown.

|                                 | Lattice (Å) | $d_{M-C}$ (Å) | $d_{M'-C}$ (Å) | $d_{M-S}$ (Å) | $d_{M'-S}$ (Å) |
|---------------------------------|-------------|---------------|----------------|---------------|----------------|
| ZrTiCS <sub>2</sub>             | 3.31        | 2.33          | 2.26           | 2.53          | 2.41           |
| HfTiCS <sub>2</sub>             | 3.29        | 2.31          | 2.26           | 2.50          | 2.41           |
| ZrHfCS <sub>2</sub>             | 3.43        | 2.4           | 2.37           | 2.53          | 2.41           |
| Ti <sub>2</sub> CS <sub>2</sub> | 3.16        | 2.19          | /              | 2.40          | /              |
| Zr <sub>2</sub> CS <sub>2</sub> | 3.45        | 2.4           | /              | 2.53          | /              |
| Hf <sub>2</sub> CS <sub>2</sub> | 3.41        | 2.37          | /              | 2.51          | /              |

**Table S2.** Lattice parameter, lengths of M–C ( $d_{M-C}$ ), M'–C ( $d_{M'-C}$ ), M–O ( $d_{M-O}$ ), and M'–O ( $d_{M'-O}$ ) bonds of All MM'CO<sub>2</sub>, M<sub>2</sub>CO<sub>2</sub>, and M<sub>2</sub>'CO<sub>2</sub> MXenes are shown.

|                                 | a (Å) | $d_{M-C}$ (Å) | $d_{M'-C}$ (Å) | $d_{M-O}$ (Å) | $d_{M'-O}$ (Å) |
|---------------------------------|-------|---------------|----------------|---------------|----------------|
| VNbCO <sub>2</sub>              | 2.98  | 2.08          | 2.14           | 2.03          | 2.07           |
| VTaCO <sub>2</sub>              | 2.99  | 2.09          | 2.13           | 2.03          | 2.08           |
| NbTaCO <sub>2</sub>             | 3.08  | 2.22          | 2.15           | 2.11          | 2.1            |
| V <sub>2</sub> CO <sub>2</sub>  | 2.88  | 2.04          | /              | 1.95          | /              |
| Nb <sub>2</sub> CO <sub>2</sub> | 3.10  | 2.19          | /              | 2.09          | /              |
| Ta <sub>2</sub> CO <sub>2</sub> | 3.12  | 2.19          | /              | 2.1           | /              |

**Table S3.** Binding energies (unit: eV) of Na-adatom on Janus MXenes at different sites. The largest binding energies were highlighted.

|                     | E <sub>T1</sub> | E <sub>H1</sub> | E <sub>H2</sub> | E <sub>T2</sub> | E <sub>h1</sub> | E <sub>h2</sub> |
|---------------------|-----------------|-----------------|-----------------|-----------------|-----------------|-----------------|
| ZrTiCS <sub>2</sub> | -2.08           | -2.62           | <b>-2.63</b>    | -1.98           | -2.50           | -2.50           |
| HfTiCS <sub>2</sub> | Unstable        | -2.47           | <b>-2.51</b>    | -1.94           | -2.49           | -2.46           |
| ZrHfCS <sub>2</sub> | Unstable        | -2.47           | <b>-2.52</b>    | -1.89           | -2.43           | -2.46           |
|                     | E <sub>T3</sub> | E <sub>H3</sub> | E <sub>H4</sub> | E <sub>T4</sub> | E <sub>h3</sub> | E <sub>h4</sub> |
| VNbCO <sub>2</sub>  | -2.59           | <b>-3.09</b>    | -3.01           | -1.53           | -1.93           | -2.01           |
| VTaCO <sub>2</sub>  | -2.29           | <b>-2.79</b>    | -2.71           | -0.88           | -1.27           | -1.35           |
| NbTaCO <sub>2</sub> | -2.06           | <b>-2.54</b>    | -2.43           | -0.88           | -1.25           | -1.34           |



**Table S4.** The alteration in the charge state of M (M') atom following the formation of S-terminated MXenes

|                                 | $\Delta Q_m$ ( e ) | $\Delta Q_{m'}$ ( e ) |
|---------------------------------|--------------------|-----------------------|
| ZrTiCS <sub>2</sub>             | -1.83              | -1.63                 |
| HfTiCS <sub>2</sub>             | -1.89              | -1.62                 |
| ZrHfCS <sub>2</sub>             | -1.88              | -1.90                 |
| Ti <sub>2</sub> CS <sub>2</sub> | -1.64              | /                     |
| Zr <sub>2</sub> CS <sub>2</sub> | -1.89              | /                     |
| Hf <sub>2</sub> CS <sub>2</sub> | -1.92              | /                     |

**Table S5.** The alteration in the charge state of M (M') atom following the formation of O-terminated MXenes

|                                 | $\Delta Q_m$ ( e ) | $\Delta Q_{m'}$ ( e ) |
|---------------------------------|--------------------|-----------------------|
| VNbCO <sub>2</sub>              | -1.66              | -2.07                 |
| VTaCO <sub>2</sub>              | -1.66              | -2.16                 |
| NbTaCO <sub>2</sub>             | -1.85              | -2.21                 |
| V <sub>2</sub> CO <sub>2</sub>  | -1.75              | /                     |
| Nb <sub>2</sub> CO <sub>2</sub> | -2.05              | /                     |
| Ta <sub>2</sub> CO <sub>2</sub> | -2.13              | /                     |

**Table S6.** Calculated electric charge transferred ( $\Delta Q$ ) from Na-atom to Janus MXenes surface.

|                     | $\Delta Q_m$ ( e ) |
|---------------------|--------------------|
| ZrTiCS <sub>2</sub> | 0.886              |
| HfTiCS <sub>2</sub> | 0.885              |
| ZrHfCS <sub>2</sub> | 0.882              |
| VNbCO <sub>2</sub>  | 0.911              |
| VTaCO <sub>2</sub>  | 0.910              |
| NbTaCO <sub>2</sub> | 0.909              |

**Table S7.** The distance (H) between the adsorbed Na atom and the M transition metal layer in various Janus MXenes

|                     | H (Å) |
|---------------------|-------|
| VNbCO <sub>2</sub>  | 2.750 |
| VTaCO <sub>2</sub>  | 2.760 |
| NbTaCO <sub>2</sub> | 2.830 |
| ZrTiCS <sub>2</sub> | 3.430 |
| HfTiCS <sub>2</sub> | 3.540 |
| ZrHfCS <sub>2</sub> | 3.510 |

**Table S8.** Binding energy (eV) of Na clusters with different structures and Janus MXenes

|                     | Configuration 1 | Configuration 2 | Configuration 3 | Configuration 4 |
|---------------------|-----------------|-----------------|-----------------|-----------------|
| ZrTiCS <sub>2</sub> | -0.13           | -0.72           | -1.19           | -1.21           |
| HfTiCS <sub>2</sub> | -0.12           | -0.77           | -1.11           | -1.12           |
| ZrHfCS <sub>2</sub> | -0.11           | -0.78           | -1.18           | -1.20           |
| VNbCO <sub>2</sub>  | -0.20           | -0.83           | -1.13           | -1.23           |
| VTaCO <sub>2</sub>  | -0.22           | -0.92           | -1.11           | -1.12           |
| NbTaCO <sub>2</sub> | -0.14           | -0.78           | -0.89           | -0.92           |

**Table S9.** The average charge ( $\Delta Q$ ) transferred to the surface of Janus MXenes by a single Na atom within the Na<sub>13</sub> cluster.

|                     | Configuration 1 | Configuration 2 | Configuration 3 | Configuration 4 |
|---------------------|-----------------|-----------------|-----------------|-----------------|
| ZrTiCS <sub>2</sub> | 0.22            | 0.47            | 0.59            | 0.73            |
| HfTiCS <sub>2</sub> | 0.21            | 0.42            | 0.55            | 0.77            |
| ZrHfCS <sub>2</sub> | 0.21            | 0.45            | 0.60            | 0.82            |
| VNbCO <sub>2</sub>  | 0.22            | 0.42            | 0.61            | 0.76            |
| VTaCO <sub>2</sub>  | 0.22            | 0.48            | 0.63            | 0.74            |
| NbTaCO <sub>2</sub> | 0.22            | 0.41            | 0.52            | 0.74            |
